# Supplementary material
Source: PubMed Central journal article supplement (PMC9954659)
Supplement: NIHMS1867945-supplement-appendix.pdf [file NIHMS1867945-supplement-appendix.pdf]

## Appendix

### Supplemental Exhibits:

#### EXHIBIT A1 (table)

Caption: [Changes to yes/no questions about debt from 2010-2018]

Source/Notes: SOURCE [Authors' Analysis of Trainee Data from the Medical Student Graduation Questionnaire (GQ) from the Association of American Medical Colleges]

#### EXHIBIT A2 (table)

Caption: [Changes to fill-in-the-blank questions about debt from 2010-2018]

Source/Notes: SOURCE [Authors' Analysis of Trainee Data from the Medical Student Graduation Questionnaire (GQ) from the Association of American Medical Colleges]

#### EXHIBIT A3 (table)

Caption: [Overall Survey Non-Response Rates by Race/Ethnicity]

Source/Notes: SOURCE [Authors' Analysis of Trainee Data from the Medical Student Graduation Questionnaire (GQ) from the Association of American Medical Colleges]

#### EXHIBIT A4 (table)

Caption: [Debt Question Non-Response Rates by race/ethnicity]

Source/Notes: SOURCE [Authors' Analysis of Trainee Data from the Medical Student Graduation Questionnaire (GQ) from the Association of American Medical Colleges]

#### EXHIBIT A5 (figure)

Caption: [Percent of Postgraduate Residents with Debt by Type of Debt and Race/Ethnicity, including consumer debt with mortgages included]

Source/Notes: SOURCE [Authors' Analysis of Trainee Data from the Medical Student Graduation Questionnaire (GQ) from the Association of American Medical Colleges] NOTES [aQuestion not including mortgage was asked of 42% of the sample, those who completed GQ prior to 2015; bQuestion including mortgage was asked of 58% of the sample, those who completed GQ in 2015 or later; c \*\*\* indicates *P* value of <0.001 for overall Chi-Square test of difference across groups]

#### EXHIBIT A6 (table)

Caption: [Association of Race/Ethnicity and All Types of Debt Adjusted for Demographics and Residency Program Characteristics]

Source/Notes: [Authors' Analysis of Trainee Data from the Medical Student Graduation Questionnaire (GQ) and the Graduate Medical Education (GME) Track from the Association of American Medical Colleges] NOTES [aQuestion not including mortgage was asked of 42% of the sample, those who completed GQ prior to 2015; bQuestion including mortgage was asked of 58% of the sample, those who completed GQ in 2015 or later; cIncludes residents active in all surgical specialties including General Surgery, Colon and Rectal Surgery, Neurological Surgery, Orthopaedic Surgery, Otolaryngology, Ophthalmology, Plastic Surgery, Thoracic Surgery, Urology, and Vascular Surgery]

EXHIBIT A7 (figure)

Caption: [Percent of Postgraduate Residents without Debt by Specialty, stratified by race/ethnicity]

Source/Notes: [Authors’ analysis of trainee data from the Medical School Graduation Questionnaire and the Graduate Medical Education Track Resident Survey, both administered by the Association of American Medical Colleges.] NOTE [Differences in debt prevalence by specialty differed by race and ethnicity ( $p < 0.001$ ).]

EXHIBIT A8 (table)

Caption: [Median amount of Debt, principal only, by Type of Debt and Race in U.S. Dollars]

Source/Notes: [Authors’ Analysis of Trainee Data from the Medical Student Graduation Questionnaire (GQ)] NOTES [<sup>a</sup>Only includes those who responded that they had debt of that type; <sup>b</sup>Question not including mortgage was asked of 42% of the sample: those who completed GQ prior to 2015; <sup>c</sup>Question including mortgage was asked of 58% of the sample: those who completed GQ in 2015 or later; <sup>d\*\*\*</sup>indicates P-value  $< 0.001$  for Kruskal-Wallis test of difference in median across group]

**Exhibit A1: Changes to yes/no questions about debt from 2010-2018**

|                  | Pre-medical education loans                                                             | Medical education loans                                                                                          | Non-educational consumer debt                                                                                                                                                                       |
|------------------|-----------------------------------------------------------------------------------------|------------------------------------------------------------------------------------------------------------------|-----------------------------------------------------------------------------------------------------------------------------------------------------------------------------------------------------|
| 2010 and earlier | “Do you still owe \$1000 or more on your premedical/college educational loans?”         | “Do you have medical school educational loans? (including loan service commitments)”                             | “Do you have any non-educational, consumer debt worth \$500 or more? (This includes car loans, residency search loans, or other consumer debt.) Please note: this does not include home mortgages.” |
| 2011-2014        | No change.                                                                              | “Do you still owe \$1000 or more on your medical school educational loans? (including loan service commitments)” | No change.                                                                                                                                                                                          |
| 2015-2017        | “Do you have any outstanding educational loans for your college/pre-medical education?” | “Do you have any outstanding educational loans (including loan service                                           | “Do you have any non-educational, consumer debt that you are legally required to repay?”                                                                                                            |

|                |                                                                                      |                                                                                                                       |                                                                                                                       |
|----------------|--------------------------------------------------------------------------------------|-----------------------------------------------------------------------------------------------------------------------|-----------------------------------------------------------------------------------------------------------------------|
|                |                                                                                      | commitments) for your medical school education?"                                                                      | (This includes credit card debt, car loans, home mortgages, residency and relocation loans, or other consumer debt.)" |
| 2018 and later | "Do you have any outstanding education loans for your college/premedical education?" | "Do you have any outstanding education loans (including loan service commitments) for your medical school education?" | No change.                                                                                                            |

**Exhibit A2: Changes to fill-in-the-blank questions about debt from 2010-2018**

|                  | Pre-medical education loans                                                                                                   | Medical education loans                                                                                            | Non-educational consumer debt                                                                                                                         |
|------------------|-------------------------------------------------------------------------------------------------------------------------------|--------------------------------------------------------------------------------------------------------------------|-------------------------------------------------------------------------------------------------------------------------------------------------------|
| 2010 and earlier | "Enter the amount you owe on your premedical/college educational loans. Principal amount borrowed (do not include interest)." | "Enter the amount you owe on your medical educational loans. Principal amount borrowed (do not include interest)." | "Please enter in the total amount of non-educational, consumer debt that you are legally required to repay. Note: do not include home mortgage debt." |
| 2011-2014        | <b>no change</b>                                                                                                              | <b>no change</b>                                                                                                   | <b>no change</b>                                                                                                                                      |
| 2015-2017        | <b>no change</b>                                                                                                              | <b>no change</b>                                                                                                   | "Please list the amount of your non-educational, consumer debt for each category listed below. Total amount."                                         |
| 2018 and later   | "Enter the amount you owe on your premedical/college education loans. Principal amount borrowed (do not include interest)."   | "Enter the amount you owe on your medical education loans. Principal amount borrowed (do not include interest)."   | <b>no change</b>                                                                                                                                      |

Exhibit A3: Overall Survey Non-Response Rates by Race/Ethnicity

| <b>Race/Ethnicity</b>            | <b>Non-Response Rate</b> |
|----------------------------------|--------------------------|
| American Indian/Alaska Native    | 25.8%                    |
| Asian                            | 22.4%                    |
| Black                            | 26.6%                    |
| Hispanic                         | 22.5%                    |
| Multiracial (Hispanic)           | 20.8%                    |
| Multiracial (non-Hispanic)       | 19.0%                    |
| Native Hawaiian/Pacific Islander | 16.9%                    |
| White                            | 16.1%                    |
| Other                            | 25.6%                    |

Exhibit A4: Debt Question Non-Response Rates by Race/Ethnicity

| <b>Race/Ethnicity</b>            | <b>Non-Response Rate</b> |
|----------------------------------|--------------------------|
| American Indian/Alaska Native    | 9.2%                     |
| Asian                            | 9.7%                     |
| Black                            | 13.2%                    |
| Hispanic                         | 8.9%                     |
| Multiracial (Hispanic)           | 8.4%                     |
| Multiracial (non-Hispanic)       | 8.2%                     |
| Native Hawaiian/Pacific Islander | 11.6%                    |
| White                            | 6.8%                     |
| Other                            | 10.2%                    |

Exhibit A5: Percent of Postgraduate Residents with Debt by Type of Debt and Race/Ethnicity, including consumer debt with mortgages included

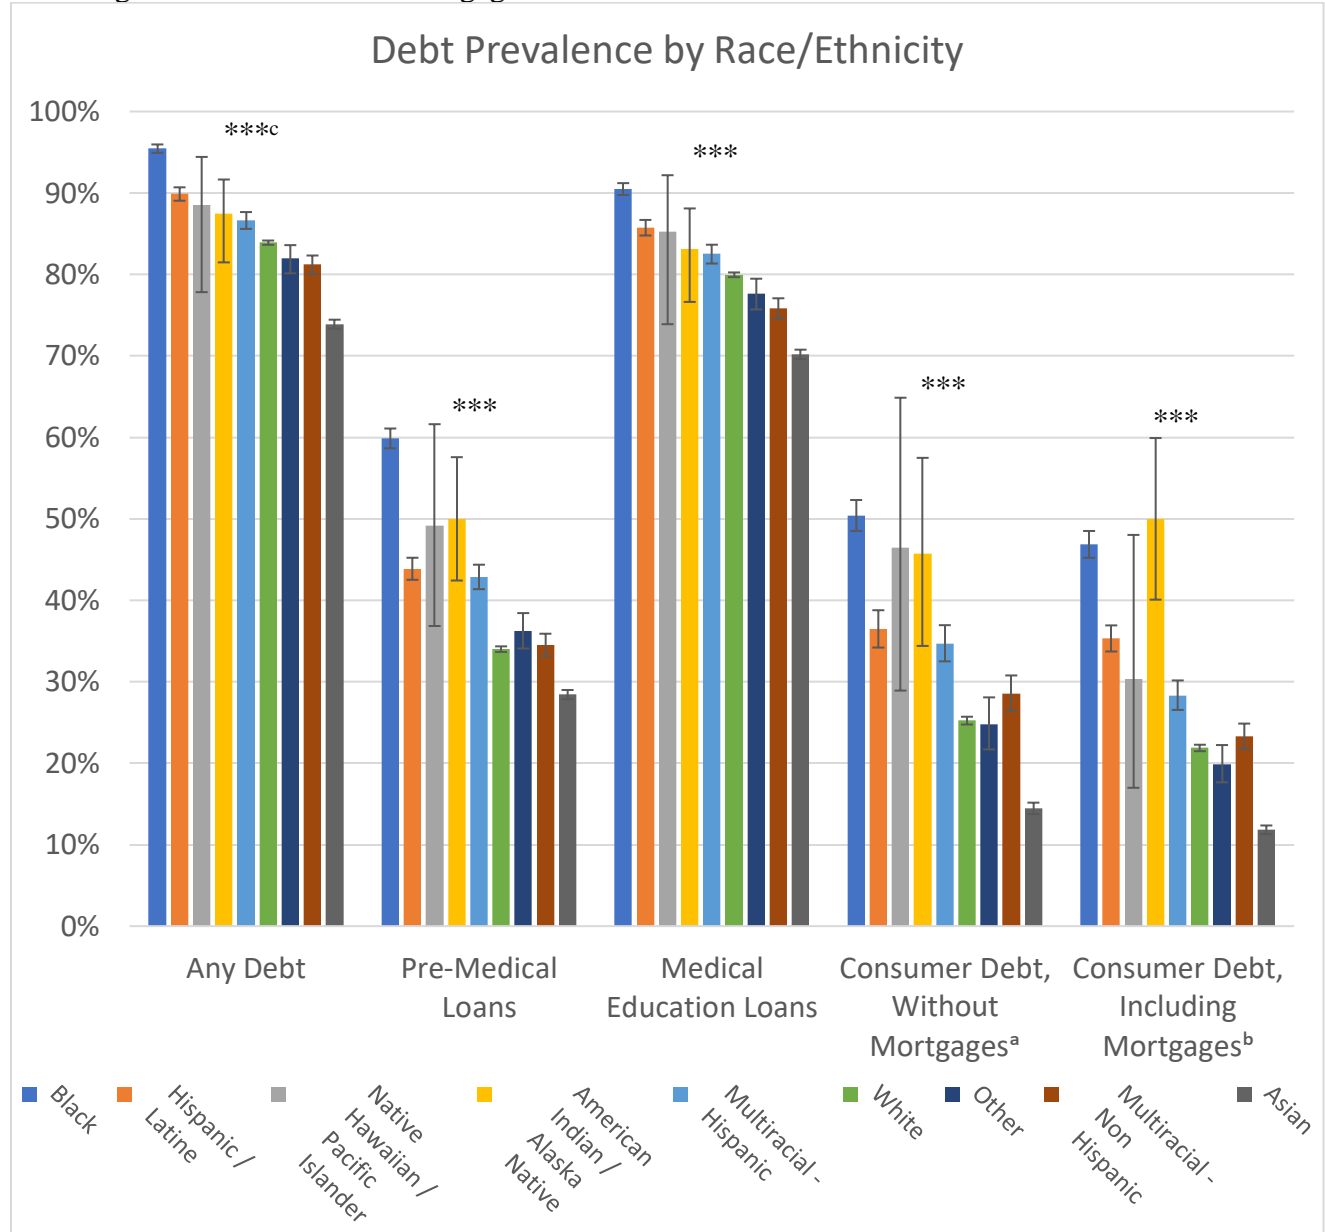

<sup>a</sup>Question not including mortgage was asked of 42% of the sample, those who completed GQ prior to 2015

<sup>b</sup>Question including mortgage was asked of 58% of the sample, those who completed GQ in 2015 or later

<sup>c</sup> \*\*\* indicates *P* value of <0.001 for overall Chi-Square test of difference across groups

Exhibit A6: Association of Race/Ethnicity and All Types of Debt Adjusted for Demographics and Residency Program Characteristics

| Characteristic                   | Any Debt<br>N=120,573 | Confidence<br>Interval | Premedical<br>Education<br>Loans<br>N=120,423 | Confidence<br>Interval | Medical<br>Education<br>Loans<br>N=120,207 | Confidence<br>Interval | Noneducational<br>Consumer<br>Debt (without<br>mortgages) <sup>a</sup><br>N=49,967 | Confidence<br>Interval | Noneducational<br>Consumer<br>Debt (with<br>mortgages) <sup>b</sup><br>N=69,977 | Confidence<br>Interval |
|----------------------------------|-----------------------|------------------------|-----------------------------------------------|------------------------|--------------------------------------------|------------------------|------------------------------------------------------------------------------------|------------------------|---------------------------------------------------------------------------------|------------------------|
| <b>Race/Ethnicity</b>            |                       |                        |                                               |                        |                                            |                        |                                                                                    |                        |                                                                                 |                        |
| American Indian/Alaska Native    | 1.17                  | 0.73-1.85              | 1.73                                          | 1.27-2.36              | 1.19                                       | 0.79-1.79              | 1.83                                                                               | 1.13-2.97              | 3.06                                                                            | 2.01-4.67              |
| Asian                            | 0.62                  | 0.60-0.64              | 0.85                                          | 0.82-0.88              | 0.64                                       | 0.62-0.66              | 0.58                                                                               | 0.54-0.62              | 0.57                                                                            | 0.54-0.61              |
| Black                            | 4.27                  | 3.77-4.83              | 2.91                                          | 2.76-3.07              | 2.46                                       | 2.26-2.69              | 3.09                                                                               | 2.85-3.36              | 3.20                                                                            | 2.97-3.44              |
| Hispanic                         | 1.87                  | 1.70-2.06              | 1.59                                          | 1.50-1.69              | 1.66                                       | 1.53-1.80              | 1.74                                                                               | 1.56-1.93              | 1.98                                                                            | 1.84-2.14              |
| Multiracial (Hispanic)           | 1.27                  | 1.16-1.39              | 1.49                                          | 1.39-1.58              | 1.21                                       | 1.11-1.31              | 1.57                                                                               | 1.42-1.75              | 1.41                                                                            | 1.29-1.56              |
| Multiracial (non-Hispanic)       | 0.87                  | 0.80-0.94              | 1.03                                          | 0.97-1.10              | 0.83                                       | 0.77-0.89              | 1.16                                                                               | 1.04-1.30              | 1.10                                                                            | 1.0-1.20               |
| Native Hawaiian/Pacific Islander | 1.39                  | 0.63-3.07              | 1.77                                          | 1.06-2.94              | 1.42                                       | 0.69-2.90              | 2.21                                                                               | 1.03-4.74              | 1.41                                                                            | 0.65-3.07              |
| White                            | 1.0                   | Reference              | 1.0                                           | Reference              | 1.0                                        | Reference              | 1.0                                                                                | Reference              | 1.0                                                                             | Reference              |
| Other                            | 0.96                  | 0.85-1.09              | 1.15                                          | 1.05-1.27              | 0.95                                       | 0.85-1.06              | 1.05                                                                               | 0.88-1.25              | 0.98                                                                            | 0.84-1.14              |
| <b>Gender</b>                    |                       |                        |                                               |                        |                                            |                        |                                                                                    |                        |                                                                                 |                        |
| Female                           | 1.0                   | Reference              | 1.0                                           | Reference              | 1.0                                        | Reference              | 1.0                                                                                | Reference              | 1.0                                                                             | Reference              |
| Male                             | 1.04                  | 1.01-1.08              | 1.03                                          | 1.00-1.05              | 1.01                                       | 0.98-1.04              | 0.99                                                                               | 0.94-1.03              | 0.91                                                                            | 0.87-0.94              |
| <b>Age (years)</b>               |                       |                        |                                               |                        |                                            |                        |                                                                                    |                        |                                                                                 |                        |
| <24                              | 1.0                   | Reference              | 1.0                                           | Reference              | 1.0                                        | Reference              | 1.0                                                                                | Reference              | 1.0                                                                             | Reference              |

|                        |      |           |      |           |      |           |      |            |       |            |
|------------------------|------|-----------|------|-----------|------|-----------|------|------------|-------|------------|
| 24-26                  | 2.25 | 1.84-2.74 | 1.24 | 1.0-1.54  | 2.11 | 1.74-2.57 | 2.34 | 1.39-3.93  | 2.29  | 1.35-3.90  |
| 27-29                  | 2.84 | 2.33-3.47 | 1.66 | 1.34-2.07 | 2.56 | 2.10-3.11 | 3.79 | 2.25-6.37  | 3.93  | 2.31-6.68  |
| 30-32                  | 2.98 | 2.43-3.64 | 2.53 | 2.03-3.14 | 1.92 | 1.58-2.34 | 6.50 | 3.86-10.97 | 8.06  | 4.73-13.72 |
| 33+                    | 4.50 | 3.63-5.56 | 3.20 | 2.56-3.99 | 2.55 | 2.08-3.12 | 9.28 | 5.49-15.71 | 15.30 | 8.96-26.11 |
| <b>Graduation Year</b> |      |           |      |           |      |           |      |            |       |            |
| 2013 or earlier        | 1.0  | Reference | 1.0  | Reference | 1.0  | Reference | 1.0  | Reference  | 1.0   | Reference  |
| 2014-2016              | 0.69 | 0.67-0.72 | 0.90 | 0.88-0.93 | 0.67 | 0.64-0.69 | 0.85 | 0.81-0.89  |       |            |
| 2017 or later          | 0.50 | 0.48-0.52 | 0.83 | 0.80-0.85 | 0.48 | 0.46-0.50 |      |            | 0.85  | 0.82-0.88  |
| <b>Specialty</b>       |      |           |      |           |      |           |      |            |       |            |
| Emergency Medicine     | 0.78 | 0.72-0.85 | 0.90 | 0.85-0.96 | 0.81 | 0.75-0.88 | 0.97 | 0.87-1.08  | 0.96  | 0.88-1.04  |
| Family Medicine        | 1.0  | Reference | 1.0  | Reference | 1.0  | Reference | 1.0  | Reference  | 1.0   | Reference  |
| Internal Medicine      | 0.52 | 0.49-0.56 | 0.74 | 0.71-0.78 | 0.58 | 0.54-0.61 | 0.70 | 0.64-0.77  | 0.69  | 0.64-0.74  |
| Pediatrics             | 0.69 | 0.63-0.74 | 0.82 | 0.77-0.86 | 0.72 | 0.67-0.78 | 0.73 | 0.65-0.81  | 0.75  | 0.70-0.82  |
| Surgery                | 0.62 | 0.58-0.67 | 0.83 | 0.79-0.87 | 0.65 | 0.61-0.69 | 1.03 | 0.94-1.12  | 0.90  | 0.83-0.96  |
| Other                  | 0.60 | 0.56-0.64 | 0.81 | 0.77-0.85 | 0.63 | 0.59-0.67 | 0.89 | 0.82-0.96  | 0.82  | 0.77-0.88  |
| <b>Region</b>          |      |           |      |           |      |           |      |            |       |            |
| Central                | 1.0  | Reference | 1.0  | Reference | 1.0  | Reference | 1.0  | Reference  | 1.0   | Reference  |
| Northeast              | 0.74 | 0.71-0.77 | 0.91 | 0.88-0.94 | 0.77 | 0.74-0.80 | 0.81 | 0.76-0.86  | 0.75  | 0.71-0.79  |
| South                  | 0.83 | 0.80-0.87 | 0.78 | 0.76-0.81 | 0.81 | 0.78-0.85 | 1.09 | 1.03-1.15  | 1.15  | 1.09-1.21  |
| West                   | 0.80 | 0.76-0.84 | 0.79 | 0.76-0.82 | 0.79 | 0.76-0.83 | 0.98 | 0.91-1.04  | 0.93  | 0.88-0.98  |



<sup>a</sup>Question not including mortgage was asked of 42% of the sample, those who completed GQ prior to 2015

<sup>b</sup>Question including mortgage was asked of 58% of the sample, those who completed GQ in 2015 or later

<sup>c</sup>Includes residents active in all surgical specialties including General Surgery, Colon and Rectal Surgery, Neurological Surgery, Orthopaedic Surgery, Otolaryngology, Ophthalmology, Plastic Surgery, Thoracic Surgery, Urology, and Vascular Surgery

Exhibit A7: Percent of Postgraduate Residents without Debt by Specialty, stratified by race/ethnicity

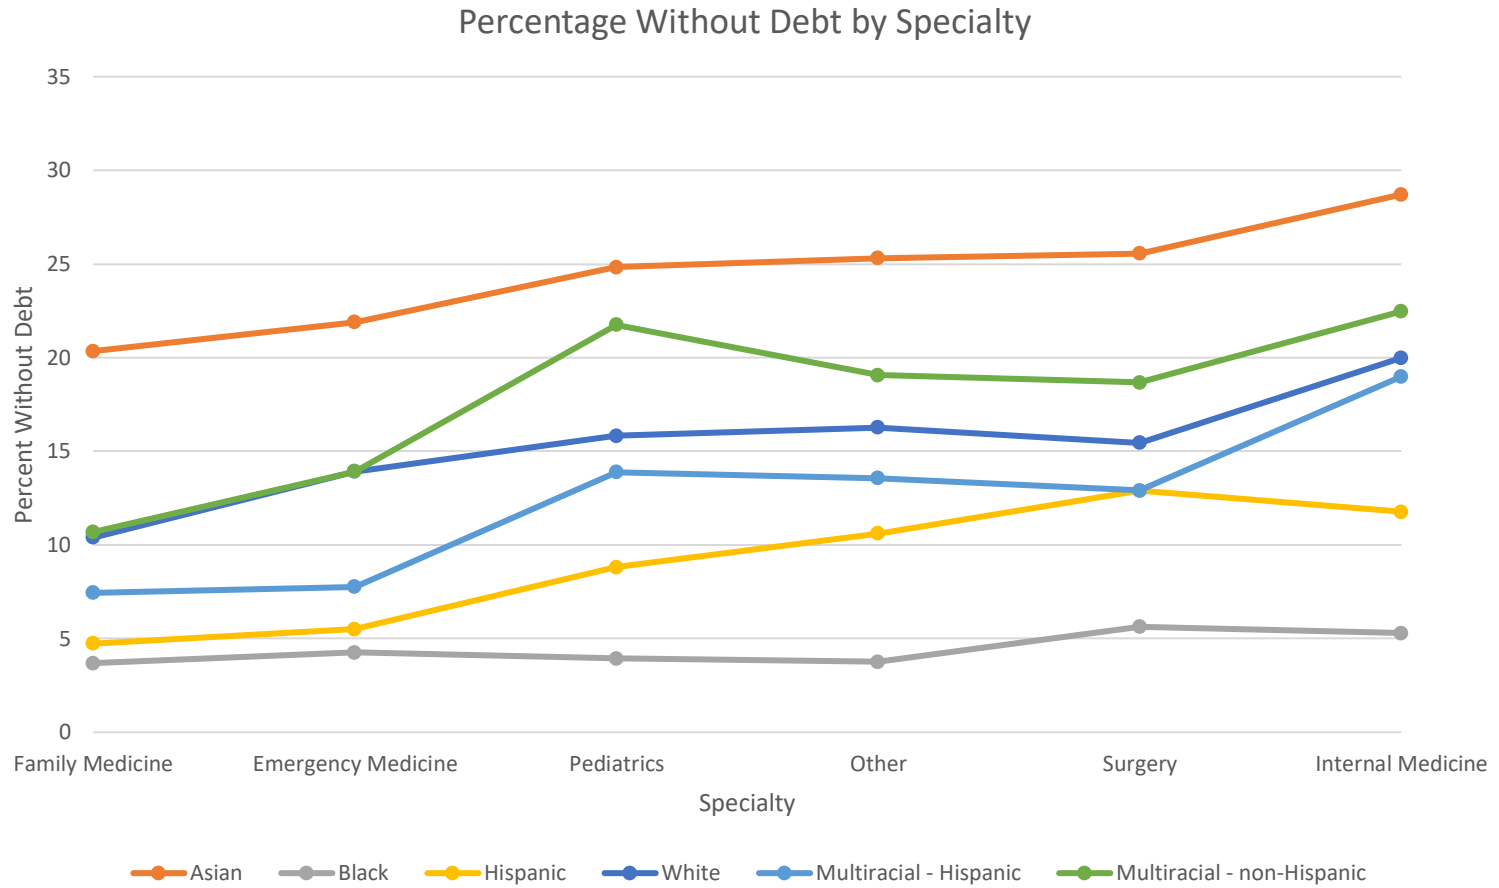

**Exhibit A8: Median amount of Debt, principal only, by Type of Debt and Race in U.S. Dollars**

| Type of Debt <sup>a</sup>                                                            | Median amount of debt in U.S. Dollars, \$ |                     |         |                     |         |                     |          |                     |                                   |                     |         |                     |
|--------------------------------------------------------------------------------------|-------------------------------------------|---------------------|---------|---------------------|---------|---------------------|----------|---------------------|-----------------------------------|---------------------|---------|---------------------|
|                                                                                      | American Indian/ Alaska Native            | Interquartile Range | Asian   | Interquartile Range | Black   | Interquartile Range | Hispanic | Interquartile Range | Native Hawaiian/ Pacific Islander | Interquartile Range | White   | Interquartile Range |
| <b>Pre-Medical Education Loans<sup>***d</sup></b><br>N=40,402                        | 17,000                                    | 10,000-32,500       | 20,000  | 10,000-50,000       | 25,000  | 12,000-50,000       | 20,000   | 10,000-45,000       | 20,000                            | 13,000-50,000       | 20,000  | 12,000-40,000       |
| <b>Medical Education Loans<sup>***</sup></b><br>N=91,908                             | 160,000                                   | 83,000-200,000      | 160,000 | 88,000-200,000      | 180,000 | 120,000-250,000     | 170,000  | 110,000-220,000     | 200,000                           | 130,000-270,000     | 180,000 | 120,000-230,000     |
| <b>Non-Educational Consumer Debt (Mortgages excluded)<sup>b***</sup></b><br>N=12,233 | 9,000                                     | 4,000-15,000        | 7,000   | 3,000-15,000        | 9,000   | 4,000-15,000        | 9,000    | 5,000-15,000        | 10,000                            | 6,000-15,000        | 10,000  | 4,500-16,000        |
| <b>Non-Educational Consumer Debt (Mortgages included)<sup>c***</sup></b><br>N=14,644 | 14,500                                    | 7,500-36,000        | 10,000  | 3,000-22,000        | 10,000  | 4,000-20,500        | 10,000   | 4,000-20,000        | 17,500                            | 8,400-30,000        | 15,000  | 5,000-56,200        |

| Type of Debt <sup>a</sup>                                                            | Median amount of debt in U.S. Dollars, \$ |                     |                            |                     |         |                     |
|--------------------------------------------------------------------------------------|-------------------------------------------|---------------------|----------------------------|---------------------|---------|---------------------|
|                                                                                      | Multiracial – Hispanic                    | Interquartile Range | Multiracial – non-Hispanic | Interquartile Range | Other   | Interquartile Range |
| <b>Pre-Medical Education Loans<sup>***d</sup></b><br>N=40,402                        | 24,250                                    | 12,000-50,000       | 20,000                     | 12,000-50,000       | 25,000  | 13,000-50,000       |
| <b>Medical Education Loans<sup>***</sup></b><br>N=91,908                             | 175,000                                   | 110,000-230,000     | 178,000                    | 110,000-230,000     | 170,000 | 110,000-230,000     |
| <b>Non-Educational Consumer Debt (Mortgages excluded)<sup>b***</sup></b><br>N=12,233 | 6,500                                     | 4,000-17,000        | 8,500                      | 5,000-15,000        | 10,000  | 3,500-15,000        |
| <b>Non-Educational Consumer Debt (Mortgages included)<sup>c***</sup></b><br>N=14,644 | 10,000                                    | 4,300-22,000        | 10,000                     | 5,000-33,000        | 10,000  | 4,000-28,000        |

<sup>a</sup>Only includes those who responded that they had debt of that type

<sup>b</sup>Question not including mortgage was asked of 42% of the sample: those who completed GQ prior to 2015

<sup>c</sup>Question including mortgage was asked of 58% of the sample: those who completed GQ in 2015 or later

<sup>d\*\*\*</sup> indicates P-value <0.001 for Kruskal-Wallis test of difference in median across group
